# Supplementary material
Source: publisher figshare collection journal article supplement (https://acs.figshare.com/ndownloader/files/4088035)
Supplement: Supplementary file 1 [file 4088035]

# Facile Preparation Method for Inclusion Complexes between Amylose and Polytetrahydrofurans

*Rachmawati Rachmawati, Albert J. J. Woortman, Katja Loos\**

Department of Polymer Chemistry, Zernike Institute for Advanced Materials, University of  
Groningen, Nijenborgh 4, 9747AG Groningen, The Netherlands

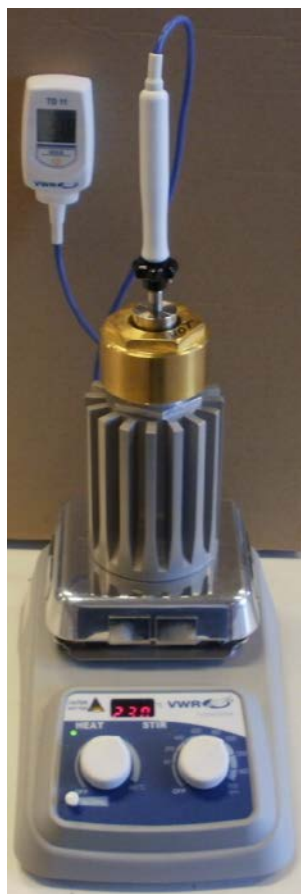

**Figure 1.** Pressure vessel for preparing amylose inclusion complexes.

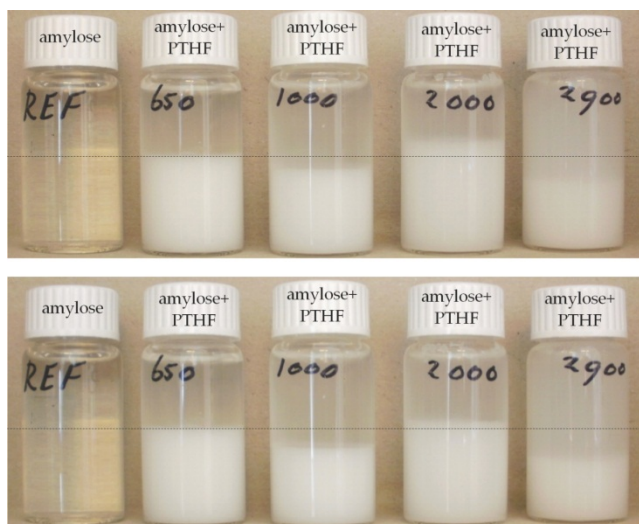

**Figure 2.** Distinctive appearance between amylose and amylose-PTHF complexes after 16 h rotation at 85 °C followed by sedimentation at 85 °C for 1 h (top) and 2 h (bottom).

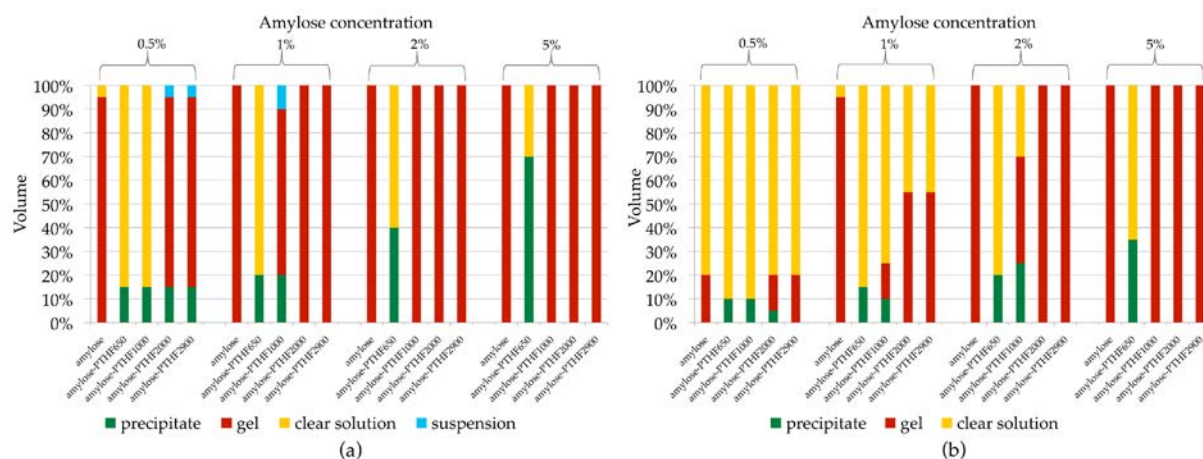

**Figure 3.** Estimation on gelation and sedimentation behavior of amylose-PTHF complexes after more than 16 h at room temperature (a) and after additional centrifugation for 30 min at 1000 rpm (b).

**Table 1.** Estimation of uncomplexed amylose for amylose-PTHF complexes.

| Guest molecules      | Reference (complex) <sup>a</sup>   | Reference (amylose) <sup>a</sup>                                                  | Gel volume (complex)     | Uncomplexed amylose | Uncomplexed amylose |
|----------------------|------------------------------------|-----------------------------------------------------------------------------------|--------------------------|---------------------|---------------------|
| PTHF650              | Figure 3(a) (5%)<br>no gel volume  | Figure 3(a) (0.5%)<br>gel 95%                                                     | 0 < 95%                  | < 10%               | < 5.3%              |
|                      | Figure 2 (5%)<br>precipitate 50%   | Figure 3(a) (0.5%)<br>gel 95%                                                     | [50/95]x[0.5/5]x<br>100% | < 5.3%              |                     |
| PTHF1000             | Figure 3(a) (1%)<br>gel volume 70% | Figure 3(a) (0.5%)<br>gel 95%                                                     | 70% < 95%                | < 50%               | 25-50%              |
|                      | Figure 3(b) (2%)<br>gel volume 45% | Figure 3(b) (0.5%)<br>gel volume 20%<br>and<br>Figure 3(b) (1%)<br>gel volume 95% | 20% < 45% <<br>95%       | 25-50%              |                     |
| PTHF2000<br>PTHF2900 | Figure 3(b) (1%)<br>gel volume 55% | Figure 3(b) (0.5%)<br>gel volume 20%                                              | 55% > 20%                | > 50%               | > 50%               |

<sup>a</sup>Figure 2 and 3 from the Supporting Information section are used as references.

**Table 2.** DSC data of inclusion complexes between amylose and PTHF.

| Sample                      |  | Run<br>(°C) | Heating scan  |              | $\Delta H$ (J/g) | Cooling scan  |              | $\Delta H$<br>(J/g) |
|-----------------------------|--|-------------|---------------|--------------|------------------|---------------|--------------|---------------------|
|                             |  |             | Onset<br>(°C) | Peak<br>(°C) |                  | Onset<br>(°C) | Peak<br>(°C) |                     |
| <b>Method A</b>             |  |             |               |              |                  |               |              |                     |
| PTHF1100 <sup>a</sup>       |  | 1 (120)     | 21.4          | 23.3         | 21.8             | 10.9          | 7.7          | -19.4               |
|                             |  | 2 (140)     | 20.9          | 23.5         | 23.4             | 10.6          | 7.7          | -19.9               |
|                             |  | 3 (160)     | 20.1          | 23.1         | 22.9             | 10.3          | 7.5          | -18.6               |
| Potato amylose<br>with      |  |             |               |              |                  |               |              |                     |
| 5% PTHF1100                 |  | 2 (140)     | 120.3         | 128.2        | 6.9              | 106.5         | 101.4        | -5.0                |
|                             |  | 3 (160)     | 130.0         | 138.3        | 5.3              | 104.4         | 100.4        | -1.6                |
| 20% PTHF1100                |  | 2 (140)     | 117.5         | 124.8        | 18.2             | 111.7         | 105.9        | -17.5               |
|                             |  | 3 (160)     | 125.6         | 133.8        | 21.1             | 105.5         | 101.1        | -12.8               |
| 20% PTHF650                 |  | 3 (160)     | 126.0         | 132.3        | 17.7             | 105.0         | 97.8         | -22.3               |
| 20% PTHF1000                |  | 3 (160)     | 128.4         | 133.6        | 14.2             | 106.6         | 100.5        | -13.6               |
| 20% PTHF2000                |  | 3 (160)     | 130.4         | 134.6        | 2.7              | 108.4         | 102.2        | -3.3                |
| <b>Method B</b>             |  |             |               |              |                  |               |              |                     |
| Potato amylose<br>with      |  |             |               |              |                  |               |              |                     |
| 20% PTHF650                 |  | 3 (160)     | 126.0         | 133.3        | 19.9             | 104.0         | 95.7         | -24.8               |
| 20% PTHF1000                |  | 3 (160)     | 126.9         | 134.1        | 15.0             | 106.7         | 100.5        | -16.0               |
| 20% PTHF2000                |  | 3 (160)     | 129.5         | 134.8        | 4.5              | 105.1         | 97.8         | -4.8                |
| Synthetic amylose<br>with   |  |             |               |              |                  |               |              |                     |
| 20% PTHF650                 |  | 3 (160)     | 122.7         | 130.8        | 9.5              | 107.0         | 101.2        | -14.6               |
| 20% PTHF1000                |  | 3 (160)     | 123.8         | 130.8        | 8.8              | 104.6         | 99.1         | -7.6                |
| 20% PTHF2000                |  | 3 (160)     | 123.5         | 130.6        | 2.9              | 102.1         | 97.4         | -2.6                |
| 20% PTHF1100                |  | 3 (160)     | 124.3         | 135.2        | 15.7             | 109.5         | 104.3        | -9.2                |
| 20% PTHF650                 |  | 4 (160)     | 127.1         | 133.4        | 19.3             |               |              |                     |
| 20% PTHF1000                |  | 4 (160)     | 125.3         | 134.5        | 14.2             |               |              |                     |
| 20% PTHF2000                |  | 4 (160)     | 119.4         | 134.0        | 10.0             |               |              |                     |
| 20% PTHF1100                |  | 4 (160)     | 122.9         | 135.5        | 18.0             |               |              |                     |
| <b>Method C<sup>b</sup></b> |  | 1 (160)     |               |              |                  | 60            | 40           | (19-40)             |
| Potato amylose              |  | 1 (160)     |               |              |                  |               |              |                     |
| Potato amylose<br>with      |  |             |               |              |                  |               |              |                     |
| 20% PTHF650                 |  | 1 (160)     | 129.0         | 134.2        | 26.8             | 105.5         | 98.6         | -17.2               |
| 20% PTHF1000                |  | 1 (160)     | 129.7         | 136.9        | 10.5             | 98.3          | 92.6         | -8.7                |
| 20% PTHF2000                |  | 1 (160)     |               |              |                  | 92.6          | 85.9         | -3.7                |
| 20% PTHF2900                |  | 1 (160)     |               |              |                  | 93.3          | 88.1         | -1.5                |

<sup>a</sup>Measured as 2%(w/w) concentration in water. <sup>b</sup>Measured as 5% (w/w) concentration in water. The rest of the DSC data were obtained as 10% (w/w) concentration in water. The amount of the guest PTHF was calculated based on amylose (w/w).

**Table 3.** DSC data of first heating scan of inclusion complexes between synthetic amylose and PTHF (method B).

| Day | Amylose-PTHF650 |              |                     | Amylose-PTHF1100 |              |                     |
|-----|-----------------|--------------|---------------------|------------------|--------------|---------------------|
|     | Onset<br>(°C)   | Peak<br>(°C) | $\Delta H$<br>(J/g) | Onset<br>(°C)    | Peak<br>(°C) | $\Delta H$<br>(J/g) |
| 0   | 123.8           | 131.9        | 20.2                | 124.1            | 136.6        | 18.7                |
| 1   | 125.4           | 131.4        | 24.0                | 127.3            | 137.4        | 22.9                |
| 7   | 126.0           | 131.5        | 24.2                | 128.1            | 137.3        | 21.7                |

Measured for 20% (w/w) PTHF concentration based on amylose. The measurements were conducted to study the stability of amylose-PTHF complexes.

**Table 4.** XRD data of amylose-PTHF complexes.

| Sample                                    | Diffraction peaks                |                         |                                  |                         |                                  |                         |                                  |                         |
|-------------------------------------------|----------------------------------|-------------------------|----------------------------------|-------------------------|----------------------------------|-------------------------|----------------------------------|-------------------------|
|                                           | 2 $\theta$ (°)/<br><i>d</i> (nm) | Plane<br>( <i>hkl</i> ) | 2 $\theta$ (°)/<br><i>d</i> (nm) | Plane<br>( <i>hkl</i> ) | 2 $\theta$ (°)/<br><i>d</i> (nm) | Plane<br>( <i>hkl</i> ) | 2 $\theta$ (°)/<br><i>d</i> (nm) | Plane<br>( <i>hkl</i> ) |
| Amylose <sup>a</sup>                      | 17.1/0.52                        |                         | 21.7/0.41                        |                         |                                  |                         |                                  |                         |
| PTHF                                      | 19.9/0.45                        |                         | 24.4/0.36                        |                         |                                  |                         |                                  |                         |
| Amylose<br>inclusion<br>complexes<br>with |                                  |                         |                                  |                         |                                  |                         |                                  |                         |
| PTHF650                                   | 13.1/0.68                        | 200                     | (18.4)/0.48                      | 221                     | 21.4/0.42                        | 450*                    | 23.7/0.38                        | 550*                    |
|                                           | 17.3/0.51                        | A                       | 19.8/0.45                        | 310                     | 22.4/0.40                        | 002 <sup>A</sup>        | (25.0)/0.36                      | 340                     |
| PTHF-<br>b650                             | 17.2/0.52                        | A                       | 22.2/0.40                        | A                       | (25.9)/0.34                      | 422*                    |                                  |                         |
|                                           | 19.6/0.45                        | P                       | 23.9/0.37                        | 222*                    | (28.6)/0.31                      | 411                     |                                  |                         |
| PTHF1000                                  | 13.4/0.66                        | 410*                    | 20.0/0.44                        | 310                     | 23.7/0.38                        | 222*                    | (28.5)/0.31                      | 411                     |
|                                           | 17.3/0.51                        | A                       | 21.4/0.42                        | 450*                    | 24.4/0.36                        | P                       |                                  |                         |
|                                           | 18.7/0.47                        | 221                     | 22.5/0.40                        | 002 <sup>A</sup>        | (27.3)/0.33                      | 222                     |                                  |                         |
| PTHF2000                                  | 13.3/0.67                        | 111                     | (18.4)/0.48                      | 221                     | (21.4)/0.42                      | 450*                    | 24.3/0.37                        | P                       |
|                                           | 17.2/0.52                        | A                       | 19.9/0.45                        | 310 <sup>P</sup>        | 22.2/0.40                        | A                       | 28.6/0.31                        | 411                     |
| PTHF2900                                  | 17.3/0.51                        | A                       | 20.0/0.44                        | 310 <sup>P</sup>        | 22.5/0.40                        | A                       | 24.4/0.36                        | P                       |
|                                           | (18.4)/0.48                      | 221                     | (21.4)/0.42                      | 450*                    | (23.8)/0.37                      | 222*                    |                                  |                         |

<sup>a</sup>The amylose was solubilized and freeze-dried. A and P denote amylose and PTHF. \**hkl* values of the diffracting planes are determined based on the orthorhombic unit cell of an amylose-*n*-butanol/*n*-pentanol complexes,<sup>21</sup> while the rest are calculated based on amylose-fatty acid complexes.<sup>15</sup> The *d*-spacing values are calculated based on Bragg's law for *n* = 1. The data in brackets are for shoulder-shaped peaks.
